# Supplementary material for: Trade-off between oxygen reduction reaction activity and CO2stability in a cation doped Ba0.9Co0.7Fe0.3O3−δperovskite cathode for solid oxide fuel cells
Source: Royal Society of Chemistry journal article supplement (doi:10.1039/d0se00878h), 2020-01-01
Supplement: d0se00878h1.pdf [file d0se00878h1.pdf]

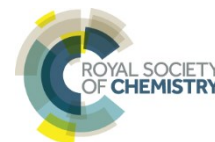

## Supporting Information

Insights into the trade-off between oxygen reduction reaction activity and CO<sub>2</sub> stability in cation doped Ba<sub>0.9</sub>Co<sub>0.7</sub>Fe<sub>0.3</sub>O<sub>3-δ</sub> perovskite cathode for solid oxide fuel cells

Yi Lu<sup>a, b</sup> Xinyu Zhao,<sup>a, b</sup> Zhihong Wang\*<sup>c</sup> and Xifeng Ding\*<sup>a, b</sup>

<sup>a</sup> School of Materials Science and Engineering, Nanjing University of Science and Technology, Nanjing 210094, China.

<sup>b</sup> Key Laboratory of advanced micro & nano Materials and technology in Jiangsu Province, Nanjing 210094, China.

<sup>c</sup> Department of Physics, Harbin Institute of Technology, Yikuang Street 2#, Harbin, Heilongjiang 150001, China.

Corresponding author: Xifeng Ding, Zhihong Wang

E-mail: [dingxifeng@njust.edu.cn](mailto:dingxifeng@njust.edu.cn) (X. Ding), [wangzhihong@hit.edu.cn](mailto:wangzhihong@hit.edu.cn) (Z. Wang)

Figure S1

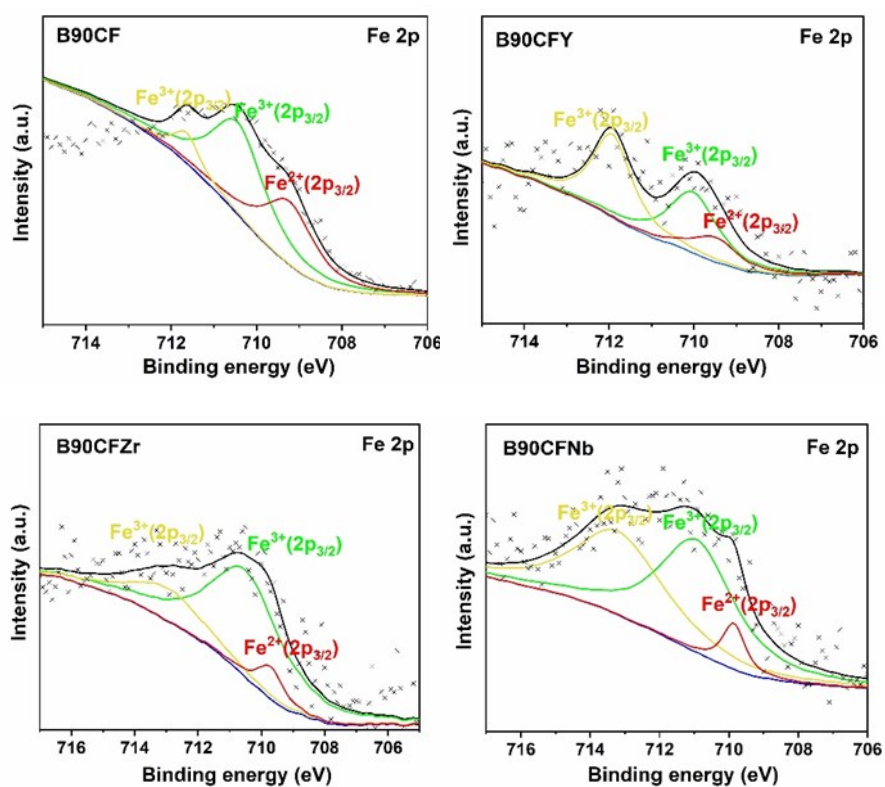

Fig. S1 XPS spectra of Fe atoms in B90CF and B90CFM (M= Zr, Nb, Y)

## Figure S2

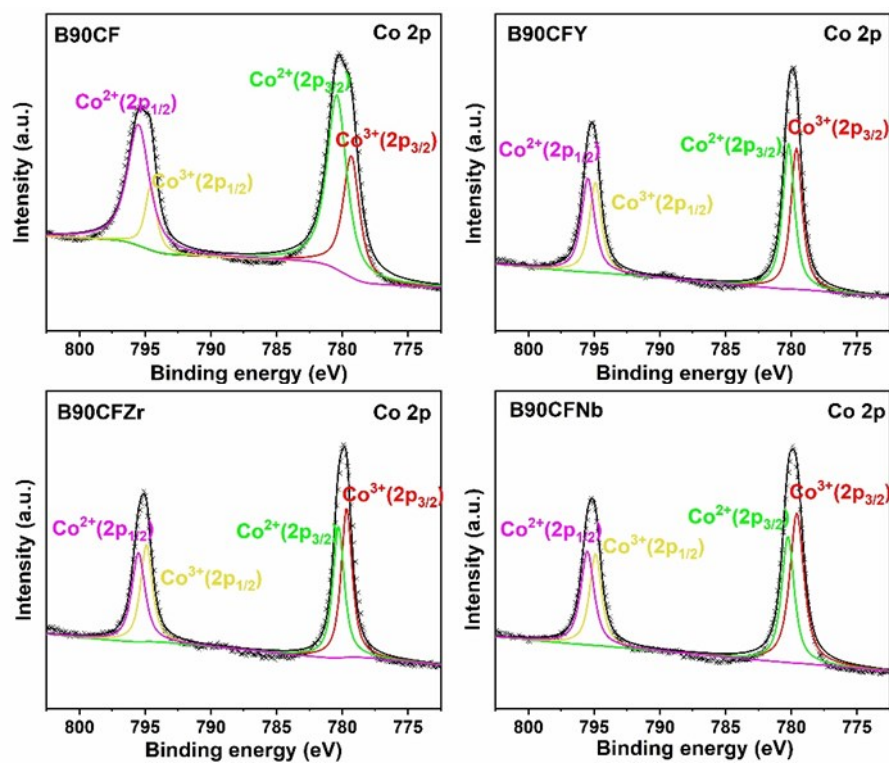

Fig. S2 XPS spectra of Co atoms in B90CF and B90CFM (M= Zr, Nb, Y)

**Table S1**

Table S1 Reitveld refinement results of B90CFZr, B90CFNb and B90CFY

| Sample  | Structure | Space group  | Lattice parameters |         |         |                       | $R_p(\%)$ | $R_w(\%)$ | $\chi^2$ |
|---------|-----------|--------------|--------------------|---------|---------|-----------------------|-----------|-----------|----------|
|         |           |              | $a$ (Å)            | $b$ (Å) | $c$ (Å) | $V$ (Å <sup>3</sup> ) |           |           |          |
| B90CFZr | cubic     | <i>Pm-3m</i> | 4.0841             | 4.0841  | 4.0841  | 68.12                 | 12.22     | 9.22      | 0.3639   |
| B90CFNb | cubic     | <i>Pm-3m</i> | 4.0714             | 4.0714  | 4.0714  | 67.49                 | 11.60     | 8.50      | 0.3198   |
| B90CFY  | cubic     | <i>Pm-3m</i> | 4.0952             | 4.0952  | 4.0952  | 68.68                 | 14.36     | 11.49     | 0.4448   |

**Table S2**

Table. S2 The wt% of each element obtained by surface scanning EDS test in the selected area of each sample shown in Figure 9

| Sample                     | Element |       |      |       |      |      |
|----------------------------|---------|-------|------|-------|------|------|
|                            | Ba      | Co    | Fe   | O     | C    | Zr   |
| <b>B90CF before test</b>   | 51.68   | 16.67 | 6.15 | 22.10 | 3.40 |      |
| <b>B90CF after test</b>    | 47.72   | 13.87 | 4.84 | 26.73 | 6.83 |      |
| <b>B90CFZr before test</b> | 54.81   | 14.85 | 4.69 | 19.12 | 3.65 | 2.88 |
| <b>B90CFZr after test</b>  | 52.11   | 13.16 | 3.95 | 24.05 | 4.21 | 2.52 |

**Table S3**

Tab. S3 Comparison of single cell peak power density between B90CFZr and B90CF

| Sample         | Peak Power Density (mW cm <sup>-2</sup> ) |       |       |
|----------------|-------------------------------------------|-------|-------|
|                | 600°C                                     | 650°C | 700°C |
| <b>B90CF</b>   | 418                                       | 561   | 682   |
| <b>B90CFZr</b> | 394                                       | 543   | 667   |
